# Supplementary material for: GEJ cancers: gastric or esophageal tumors? searching for the answer according to molecular identity
Source: PubMed Central journal article supplement (PMC5732806; doi:10.18632/oncotarget.22216), 2017-10-31
Supplement: oncotarget-08-104286-s001.pdf [file oncotarget-08-104286-s001.pdf]

# GEJ cancers: gastric or esophageal tumors? searching for the answer according to molecular identity

## SUPPLEMENTARY MATERIALS

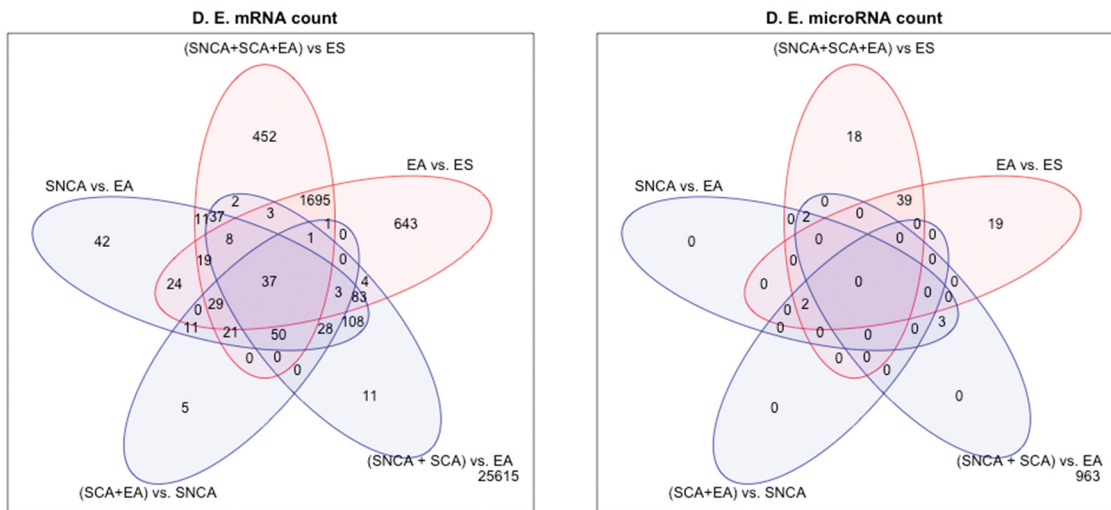

**Supplementary Figure 1: Venn diagram with the number of differentially expressed mRNA and miRNAs in each analysis.** Tissue discrimination was given as follows: stomach non-cardia adenocarcinoma (SNCA), stomach cardia adenocarcinoma (SCA), esophageal adenocarcinoma (EA) and esophageal squamous cell carcinoma (ES).

**Supplementary Table 1: mRNAs and microRNAs differentially expressed in each analysis. Tissue discrimination was given as follows: stomach non-cardia adenocarcinoma (SNCA), stomach cardia adenocarcinoma (SCA), esophageal adenocarcinoma (EA) and esophageal squamous cell carcinoma (ES)**

See Supplementary File 1
